# Supplementary material
Source: publisher figshare collection journal article supplement (https://acs.figshare.com/ndownloader/files/4490035)
Supplement: Supplementary file 1 [file 4490035]

# Supporting Information

## Dynamics of a nitroxide layer grafted onto porous silicon

Filippo Busolo<sup>a</sup>, Lorenzo Franco<sup>a</sup>, Lidia Armelao<sup>b</sup>, Michele Maggini<sup>a</sup>

<sup>a</sup>*Dipartimento di Scienze Chimiche, Università di Padova, via Marzolo 1, I-35131 Padova, Italy.*

<sup>b</sup>*ISTM-CNR and INSTM, Dipartimento di Scienze Chimiche, Università di Padova, via Marzolo 1, I-35131 Padova, Italy*

### Contents

*FIGURE S1: FT-IR spectrum of nitroxide 1.*

*FIGURE S2: ESR spectra of nitroxide 1 in toluene solution.*

*FIGURE S3: FT-IR spectrum of a freshly-etched porous silicon slab.*

*FIGURE S4: XPS survey scans and Si2p regions for a freshly-etched silicon substrate and for a nitroxide-grafted silicon slab.*

*FIGURE S5: EPR spectra of 1-PS, PS and difference spectrum.*

*FIGURE S6: EPR spectrum of nitroxide 1 drop-casted on PS.*

*FIGURE S7: Experimental and calculated ESR spectra of 1-PS.*

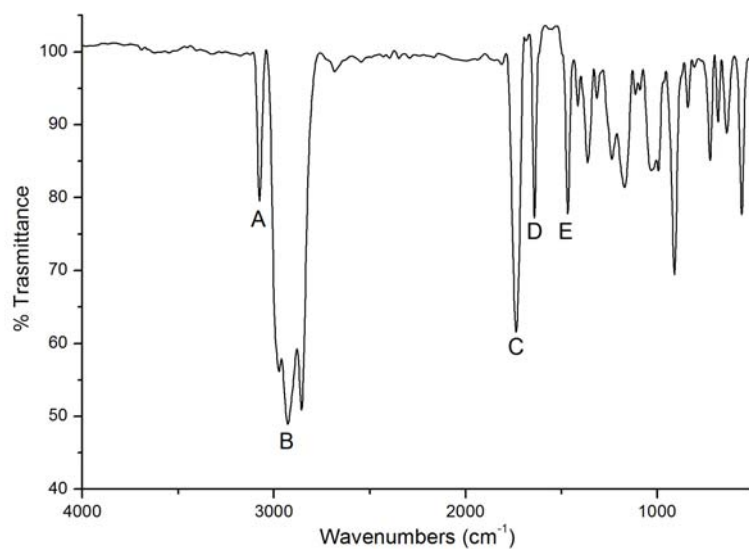

**Figure S1.** IR spectrum of **1**. A,  $3075\text{ cm}^{-1}$ ,  $\nu(\text{H-C}=\text{C})$ ; B,  $2977$ ,  $2925$ ,  $2858\text{ cm}^{-1}$ ,  $\nu(\text{Alkyl Chain})$ ; C,  $1737\text{ cm}^{-1}$   $\nu(\text{C}=\text{O})$ ; D,  $1641\text{ cm}^{-1}$   $\nu(\text{C}=\text{C})$ ; E,  $1467\text{ cm}^{-1}$   $\nu(\text{N-O})$ .

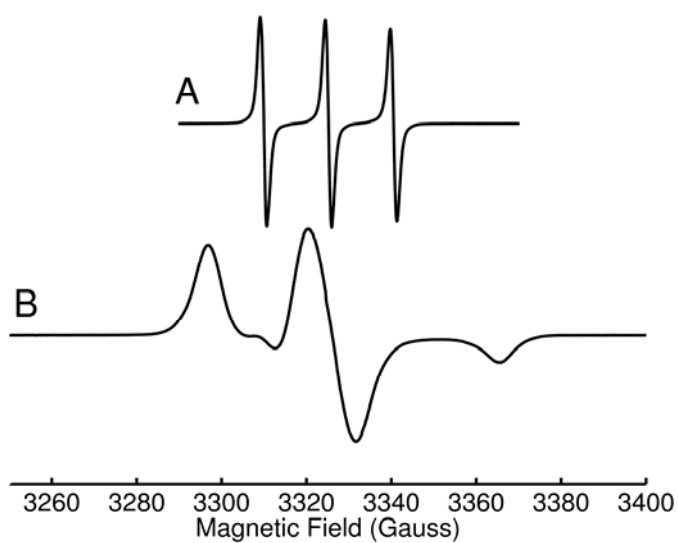

**Figure S2.** ESR spectra of **1** in toluene solution ( $c = 1 \times 10^{-4}\text{ M}$ ). (**A**) room temperature; (**B**) at 110 K.

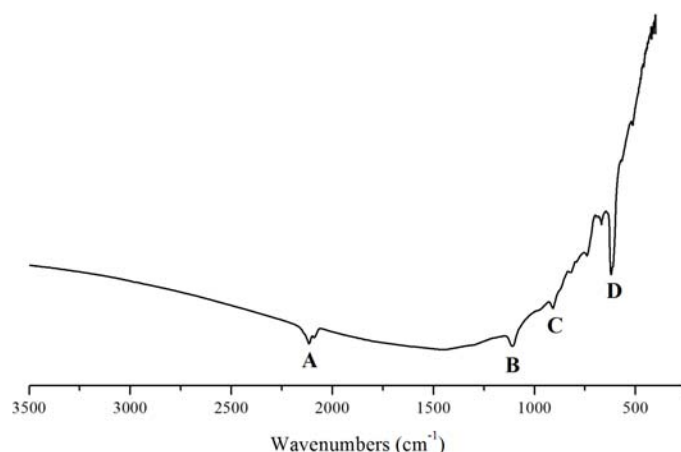

**Figure S3.** IR Spectrum for Porous Silicon (PS). A,  $2110\text{ cm}^{-1}$ ,  $\nu(\text{Si-H}_x)$ ; B,  $1100\text{ cm}^{-1}$ ,  $\nu(\text{Si-O})$ ; C,  $912\text{ cm}^{-1}$ ,  $\nu(\text{Si-H}_2)$ ; D,  $617\text{ cm}^{-1}$ ,  $\nu(\text{Si-Si})$ . The broad band in the  $2100\text{ cm}^{-1}$  region (A) is associated to the stretching modes of Si-H, Si-H<sub>2</sub> and Si-H<sub>3</sub>. The band around  $1100\text{ cm}^{-1}$  (B) indicates the presence of silicon oxides (SiO<sub>x</sub>), most likely of interstitial nature. The peak at  $912\text{ cm}^{-1}$  (C) is associated to a  $\nu(\text{Si-H}_2)$  scissor mode absorption. The low energy part of the spectrum shows a strong adsorption at around  $617\text{ cm}^{-1}$  (D) with a smaller shoulder at  $665\text{ cm}^{-1}$ : the former is commonly assigned to the  $\nu(\text{Si-Si})$  stretching mode and the latter to a  $\nu(\text{Si-H})$  wagging mode.

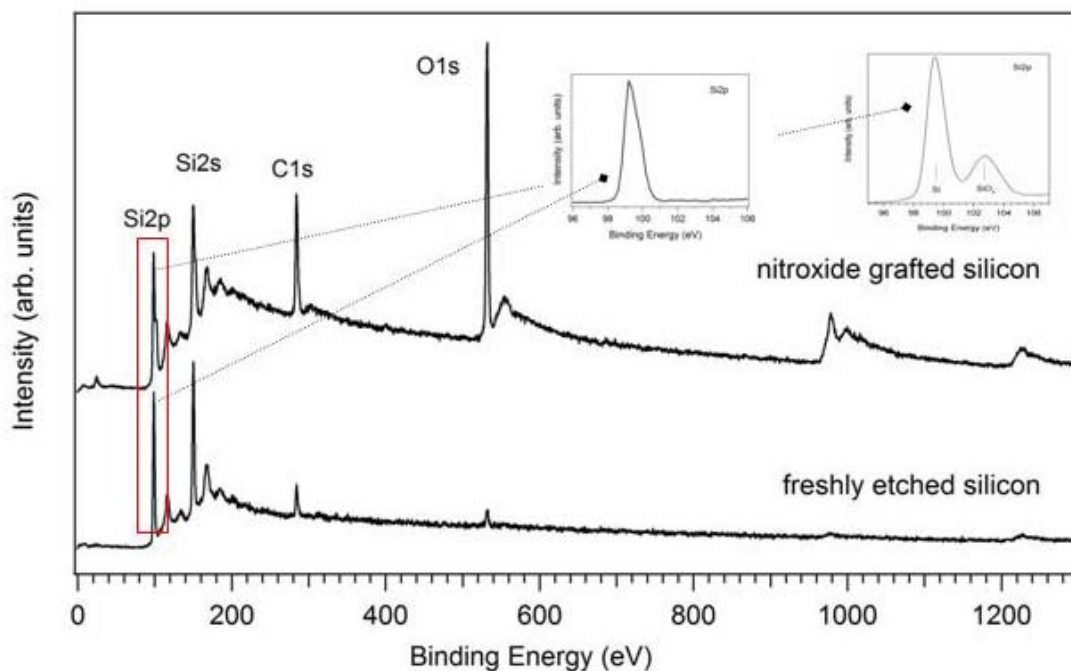

**Figure S4.** XPS survey scans for a freshly etched silicon substrate and for a nitroxide-grafted silicon slide. Correspondingly, the Si2p regions are also shown.

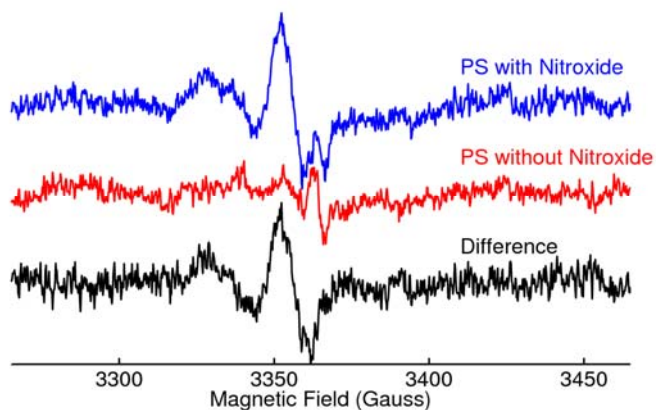

**Figure S5.** EPR spectra recorded on samples of **1-PS** (blue), of **PS** (red) and the spectrum difference between the two (black). The spectra are shifted vertically to improve readability.

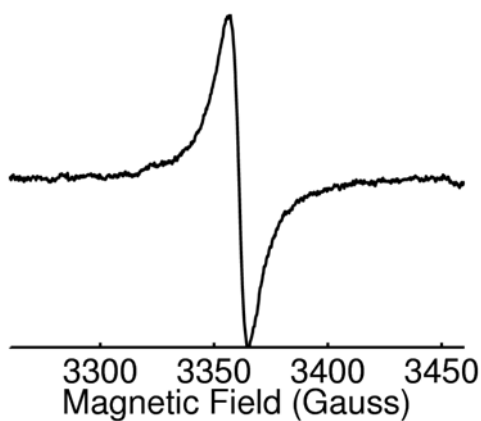

**Figure S6.** EPR spectrum recorded at  $T = 290\text{K}$  of nitroxide **1** drop-casted on **PS**.

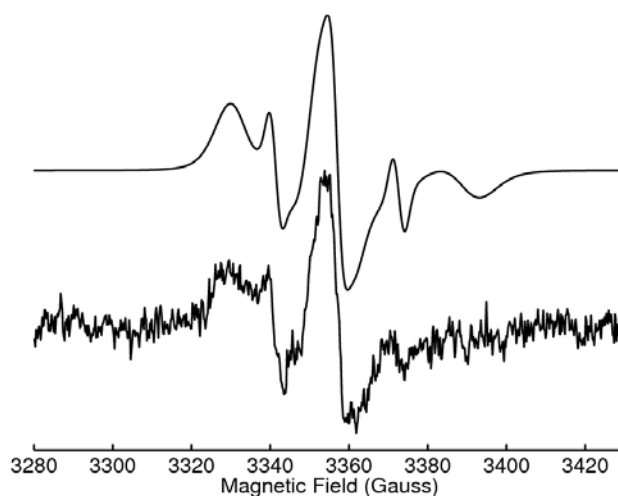

**Figure S7.** Calculated (upper) and experimental (lower) ESR spectra of **1-PS** recorded at  $T = 300\text{ K}$
